# Supplementary material for: Gelatin Reduced Graphene Oxide Nanosheets as Kartogenin Nanocarrier Induces Rat ADSCs Chondrogenic Differentiation Combining with Autophagy Modification
Source: PubMed Central journal article supplement (PMC7956601; doi:10.3390/ma14051053), 2021-02-24
Supplement: materials-14-01053-s001.pdf [file materials-14-01053-s001.pdf]

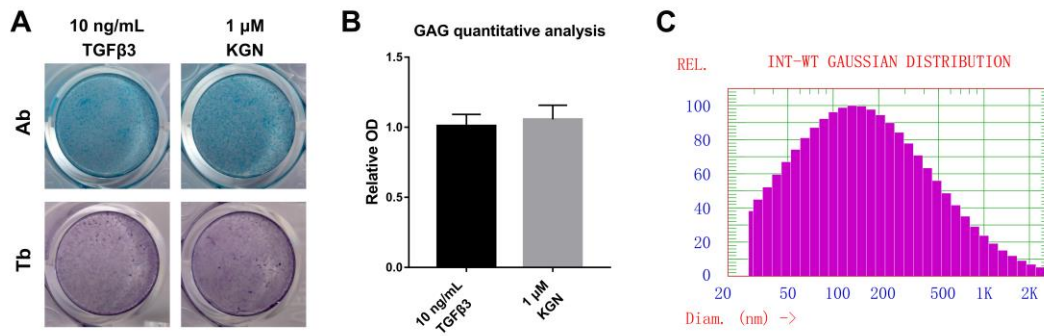

**Figure S1.** The comparison on the chondrogenic differentiation of ADSCs induced by TGFβ3 or KGN, and the particle size distribution of rGO@Ge. (A) The Ab and Tb stainings showed the similar chondrogenic differentiation of ADSCs in both 10 ng/mL TGFβ3 and 1 μM KGN culture medium. (B) The quantitative analysis of the alcian blue staining to evaluate the GAG content, which indicates no significant difference between two groups. (C) The particle size of rGO@Ge was distributed around 150 nm [1].

## References

- 1 Jiao, D.; Zheng, A.; Liu, Y.; Zhang, X.; Wang, X.; Wu, J.; She, W.; Lv, K.; Cao, L.; Jiang, X. Bidirectional differentiation of BMSCs induced by a biomimetic procallus based on a gelatin-reduced graphene oxide reinforced hydrogel for rapid bone regeneration. *Bioact. Materials* **2021**, *6*, 2011–2028.
